# Supplementary material for: USP11 augments TGFβ signalling by deubiquitylating ALK5
Source: PubMed Central journal article supplement (PMC3390794; doi:10.1098/rsob.120063), 2012-06

## SUPPLEMENTARY FIGURE LEGENDS

**Supplementary Figure 1.** TGF $\beta$  does not enhance interaction between SMAD7 and USP11. HEK293 cells were transiently transfected with empty FLAG vector or FLAG-SMAD7 alone, starved for 4 hours and stimulated for 1 hour with 50 pM TGF $\beta$ . FLAG-immunoprecipitates or extracts were resolved by SDS-PAGE and immunoblotted with antibodies against FLAG-SMAD7 and endogenous USP11.

**Supplementary Figure 2.** USP15 does not bind SMADs. HEK293 cells were transiently transfected with FLAG-SMAD1, 3, 4, 7, HA-USP11, and HA-USP15. FLAG-immunoprecipitates or extracts were resolved by SDS-PAGE and immunoblotted with antibodies against FLAG-SMADs, HA-USP11, and HA-USP15.

**Supplementary Figure 3.** Expression of DUBs in cell extracts used for TGF $\beta$  transcriptional reporter assays. HEK293 cells transiently transfected with SRE-luciferase, renilla-luciferase, HA-USP11, HA-C318S USP11 (DD), HA-USP5 and stimulated for 6 hours with or without 50 pM TGF $\beta$  as indicated. Cell extracts were resolved by SDS-PAGE and immunoblotted with antibodies against HA-USP and SMAD2.

**Supplementary Figure 4.** *RNAi* depletion of USP11 does not affect USP15 levels and *vice versa*. HEK293 cells were transiently transfected with multiple *siRNAs* targeting FoxO4 control or USP11 or USP15 separately. Extracts were resolved by SDS-PAGE and immunoblotted with antibodies against endogenous USP11, USP15, and SMAD2

**Supplementary Figure 5.** Cellular localisation of endogenous SMAD7, USP11, and ALK5. Fixed cell immunofluorescence of USP11, SMAD7, and ALK5 in HaCaT cells. Alexa Fluor 488 nm anti-sheep (USP11-green), 594 nm anti-mouse (SMAD7-red), and 647 nm anti-rabbit (ALK5-far red) were used.

**Supplementary Figure 6.** Fixed cell immunofluorescence of USP11. HeLa and HaCaT cells were transiently transfected with *siRNA* targeting USP11 to confirm USP11 antibody specificity for immunofluorescence applications.

**Supplementary Figure 7.** Catalytically inactive USP11 binds ALK5. HEK293 cells were transiently transfected with 3XFLAG-ALK5 with or without wild type or a catalytically inactive mutant (C318S) of HA-USP11. FLAG-immunoprecipitates or extracts were resolved by SDS-PAGE and immunoblotted with antibodies against FLAG-ALK5 and HA-USP11.

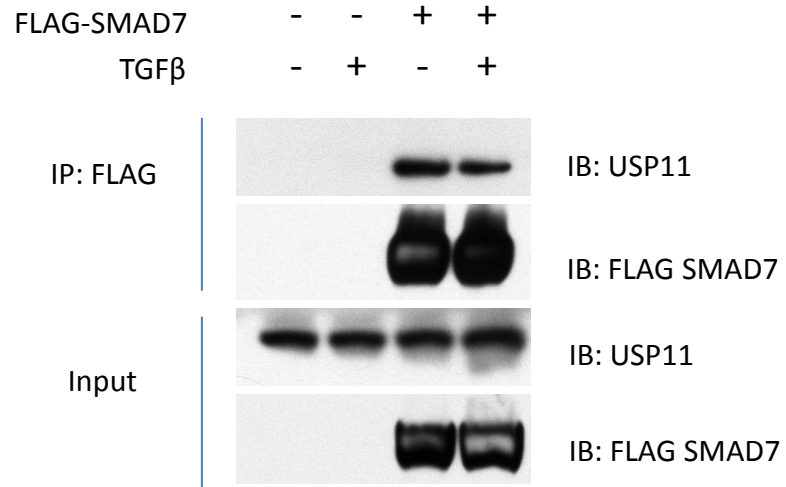

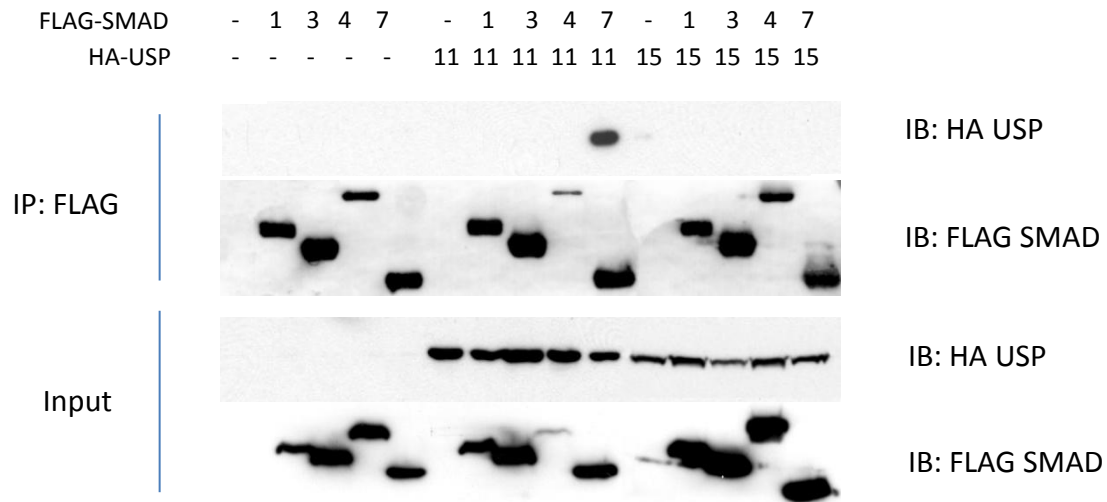

|                    |   |   |    |    |    |    |   |   |
|--------------------|---|---|----|----|----|----|---|---|
| HA USP             | - | - | 11 | 11 | DD | DD | 5 | 5 |
| TGF $\beta$        | - | + | -  | +  | -  | +  | - | + |
| Renilla Luciferase | + | + | +  | +  | +  | +  | + | + |
| SRE Luciferase     | + | + | +  | +  | +  | +  | + | + |

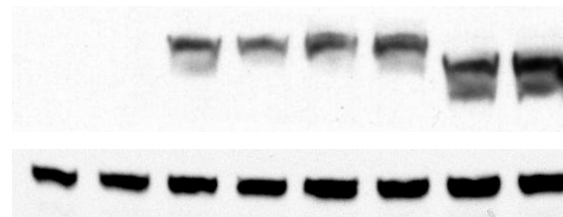

HA

SMAD2

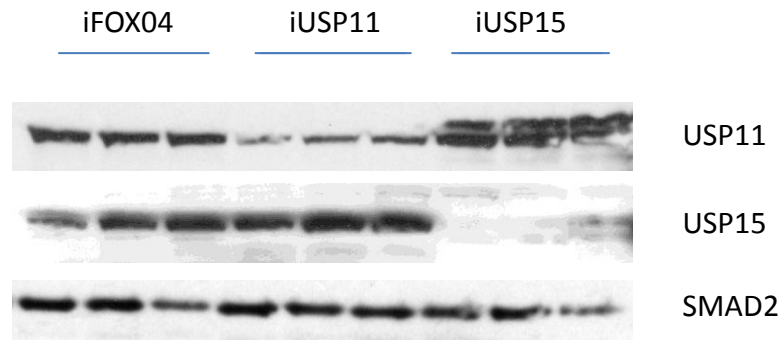

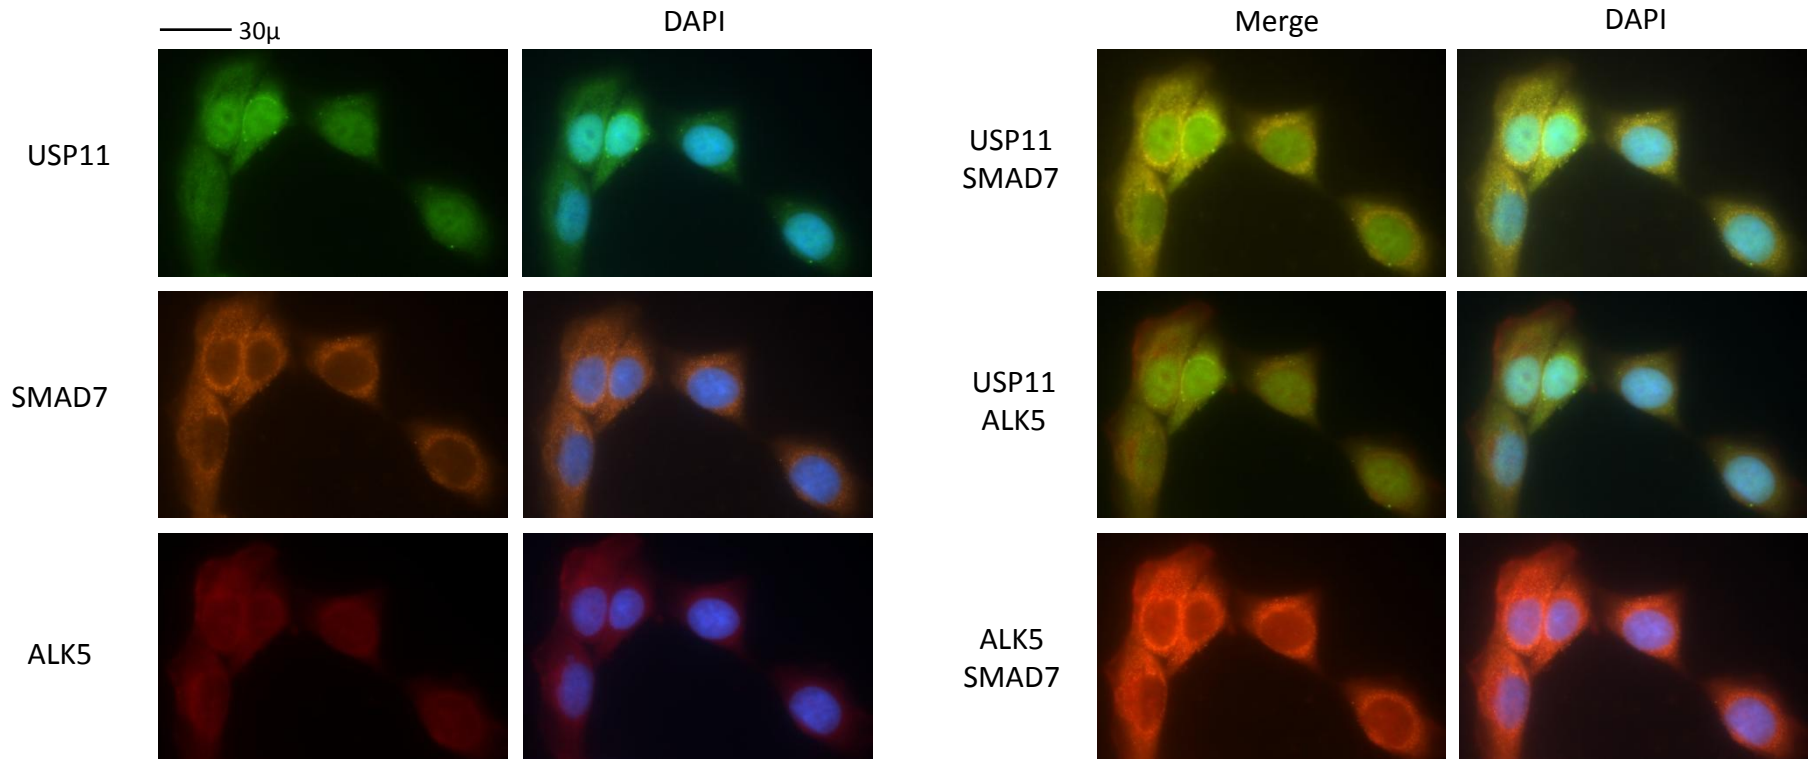

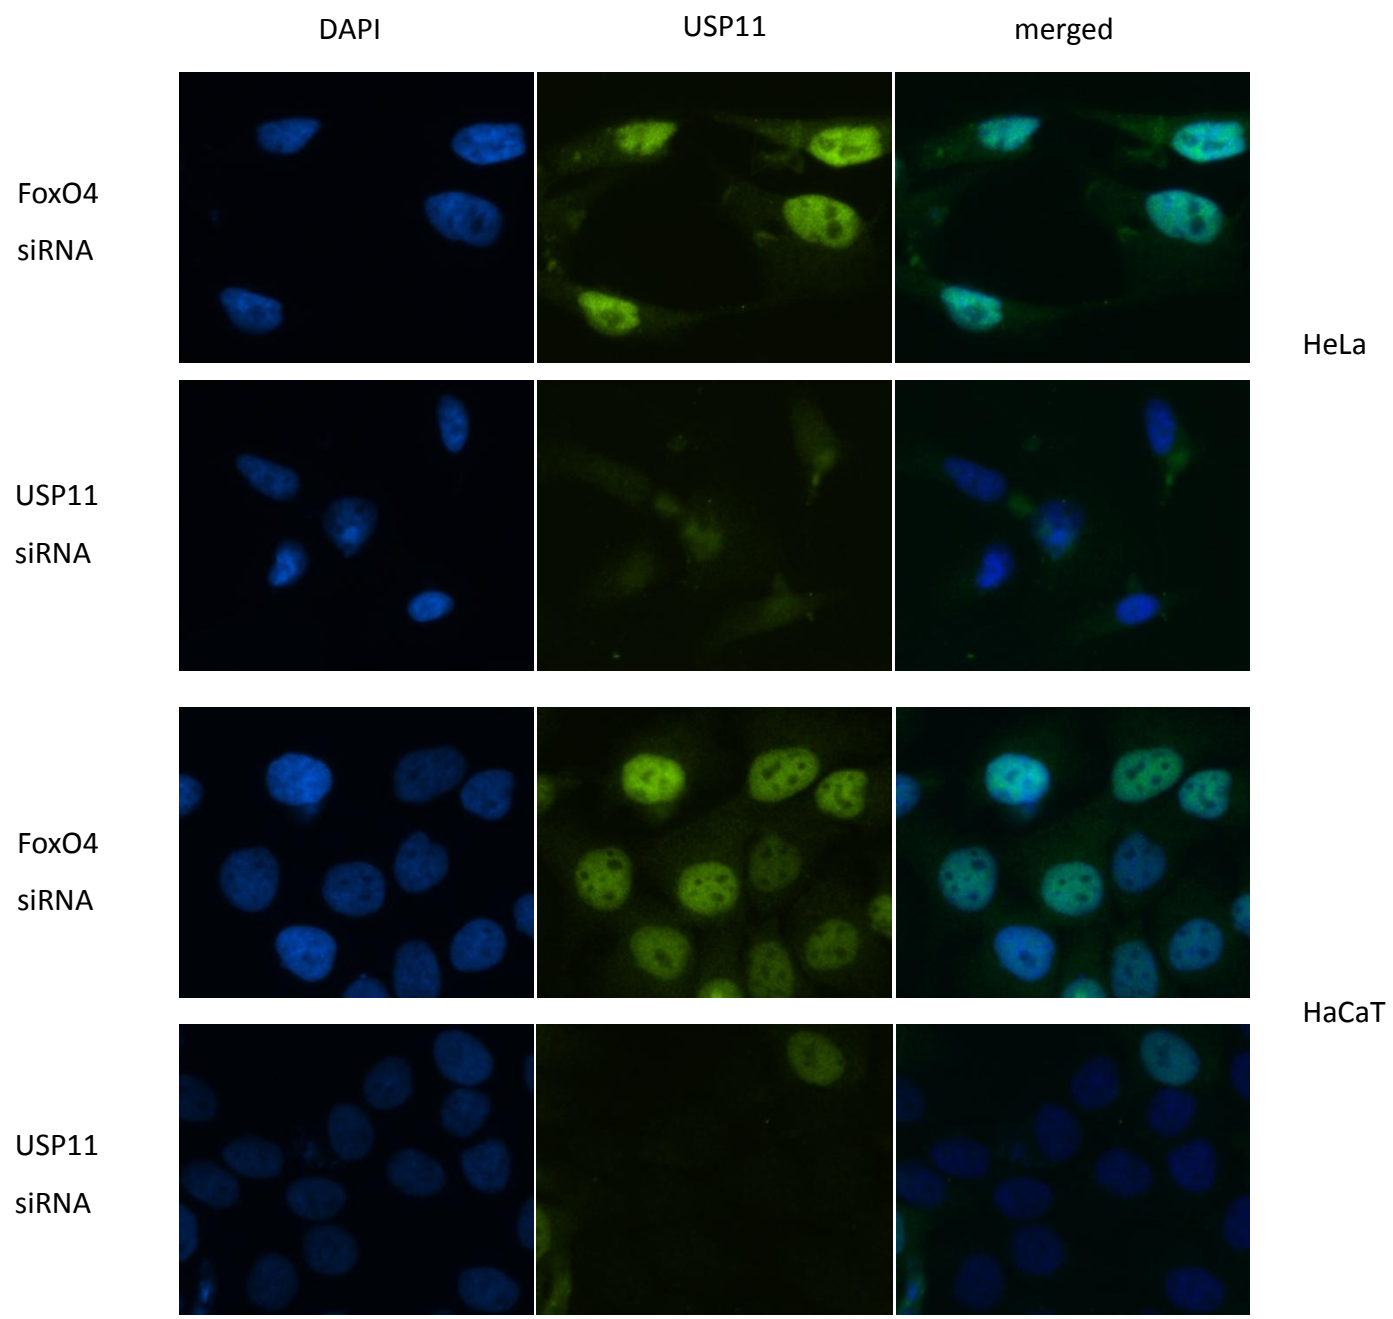



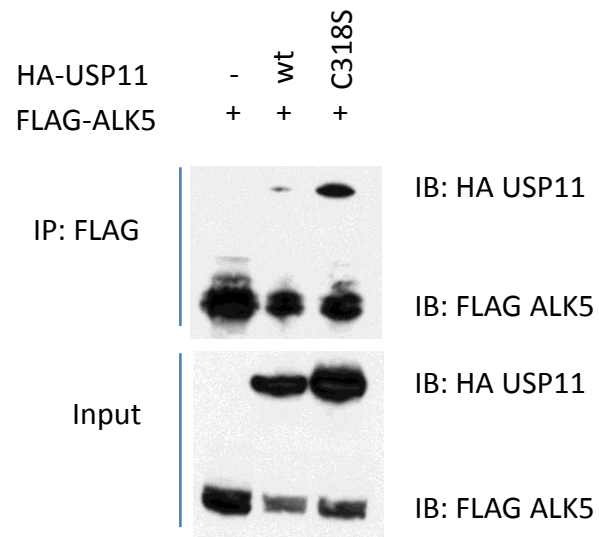

Supplement: rsob120063-s1.pdf [file rsob120063-s1.pdf]
